# Supplementary material for: Non-stoichiometric carbon-coated LiFexPO4as cathode materials for high-performance Li-ion batteries
Source: Royal Society of Chemistry journal article supplement (doi:10.1039/c7ra04510g), 2017-01-01
Supplement: c7ra04510g1.pdf [file c7ra04510g1.pdf]

## Electronic Supplementary Information (ESI)

### **Non-stoichiometric carbon-coated $\text{LiFe}_x\text{PO}_4$ as cathode materials for high-performance Li-ion batteries**

Ying Feng <sup>a</sup>, Junjie Gu <sup>b</sup>, Feng Yu <sup>c</sup>, Chunfu Lin <sup>d</sup>, Jinli Zhang <sup>a,c</sup>, Ning Nie <sup>a</sup>, Wei Li <sup>a,\*</sup>

<sup>a</sup>*Key Laboratory for Green Chemical Technology MOE; Collaborative Innovation Center of Chemical Science and Chemical Engineering (Tianjin); Key Laboratory of Systems Bioengineering MOE, School of Chemical Engineering & Technology, Tianjin University, Tianjin 300350, People's Republic of China*

<sup>b</sup>*Department of Mechanical and Aerospace Engineering, Carleton University, Ottawa K1S 5B6, Canada*

<sup>c</sup>*Key Laboratory for Green Processing of Chemical Engineering of Xinjiang Bingtuan, School of Chemistry and Chemical Engineering, Shihezi University, Shihezi 832003, People's Republic of China*

<sup>d</sup>*State Key Laboratory of Marine Resource Utilization in South China Sea, College of Materials and Chemical Engineering, Hainan University, Haikou 570228, People's Republic of China*

\*Corresponding author. Tel: 86-22-27404495; fax: 86-22-27890643.

E-mail address: [liwei@tju.edu.cn](mailto:liwei@tju.edu.cn)

**Table S1.** Element analysis results of  $\text{LiFe}_x\text{PO}_4/\text{C}$ .

| Samples                                  | Weight ratio% |       |      | Atomic ratio% |
|------------------------------------------|---------------|-------|------|---------------|
|                                          | Li            | Fe    | P    | Li/Fe/P       |
| $\text{LiFe}_{0.96}\text{PO}_4/\text{C}$ | 3.89          | 30.20 | 17.4 | 0.998:0.962:1 |
| $\text{LiFe}_{0.98}\text{PO}_4/\text{C}$ | 3.82          | 30.20 | 17.2 | 0.991:0.980:1 |
| $\text{LiFe}_{1.0}\text{PO}_4/\text{C}$  | 3.86          | 31.00 | 17.0 | 1.013:1.011:1 |
| $\text{LiFe}_{1.02}\text{PO}_4/\text{C}$ | 3.84          | 31.45 | 17.0 | 1.008:1.026:1 |
| $\text{LiFe}_{1.04}\text{PO}_4/\text{C}$ | 3.90          | 32.56 | 17.4 | 1.000:1.038:1 |

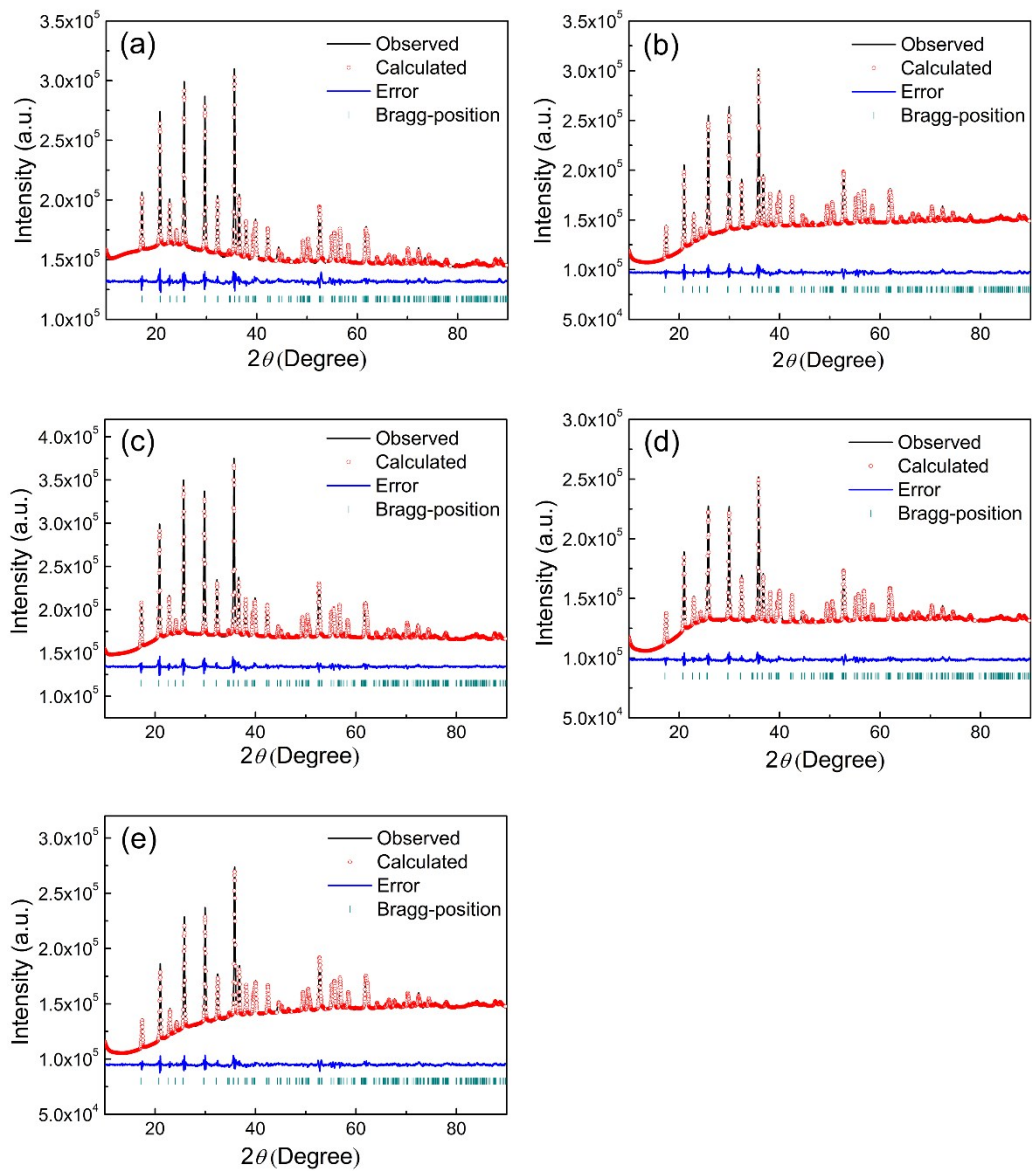

**Fig. S1.** Rietveld refinement results of (a)  $\text{LiFe}_{0.96}\text{PO}_4/\text{C}$ , (b)  $\text{LiFe}_{0.98}\text{PO}_4/\text{C}$ , (c)  $\text{LiFe}_{1.0}\text{PO}_4/\text{C}$ , (d)  $\text{LiFe}_{1.02}\text{PO}_4/\text{C}$ , and (e)  $\text{LiFe}_{1.04}\text{PO}_4/\text{C}$ .

**Table S2.** Refined structural parameters of  $\text{LiFe}_x\text{PO}_4/\text{C}$  ( $x = 0.96, 0.98, 1.0, 1.02, 1.04$ ) obtained from Rietveld refinement using X-ray powder diffraction data at room temperature. The symbols  $g$  and  $U_{\text{iso}}$  represent the occupation and isotropic thermal parameters, respectively. The numbers within parentheses are the estimated standard deviations of the last significant figure.

| (1) $\text{LiFe}_{0.96}\text{PO}_4/\text{C}$                                                                                                       |      |            |            |            |     |                                     |
|----------------------------------------------------------------------------------------------------------------------------------------------------|------|------------|------------|------------|-----|-------------------------------------|
| Atom                                                                                                                                               | Site | $x$        | $y$        | $z$        | $g$ | $100*U_{\text{iso}} (\text{\AA}^2)$ |
| Li                                                                                                                                                 | 4a   | 0.0        | 0.0        | 0.0        | 1.0 | 4.5(4)                              |
| Fe                                                                                                                                                 | 4c   | 0.2817(16) | 0.2500(0)  | 0.9706(5)  | 1.0 | 4.5(4)                              |
| P                                                                                                                                                  | 4c   | 0.0953(4)  | 0.2500(0)  | 0.4170(9)  | 1.0 | 4.5(4)                              |
| O(1)                                                                                                                                               | 4c   | 0.0955(9)  | 0.2500(0)  | 0.7368(15) | 1.0 | 4.5(4)                              |
| O(2)                                                                                                                                               | 4c   | 0.4501(11) | 0.2500(0)  | 0.2018(13) | 1.0 | 4.5(4)                              |
| O(3)                                                                                                                                               | 8d   | 0.1617(6)  | 0.0496(10) | 0.2818(9)  | 1.0 | 4.5(4)                              |
| $a = 10.3392(33) \text{\AA}$ $b = 6.0150(20) \text{\AA}$ $c = 4.7004(19) \text{\AA}$<br>$\alpha = 90^\circ$ $\beta = 90^\circ$ $\gamma = 90^\circ$ |      |            |            |            |     |                                     |
| R-factors and weight fraction<br>$R_{\text{wp}} = 0.0080$ $R_{\text{p}} = 0.0052$ $\chi^2 = 10.15$                                                 |      |            |            |            |     |                                     |
| (2) $\text{LiFe}_{0.98}\text{PO}_4/\text{C}$                                                                                                       |      |            |            |            |     |                                     |
| Atom                                                                                                                                               | Site | $x$        | $y$        | $z$        | $g$ | $100*U_{\text{iso}} (\text{\AA}^2)$ |
| Li                                                                                                                                                 | 4a   | 0.0        | 0.0        | 0.0        | 1.0 | 7.73(16)                            |
| Fe                                                                                                                                                 | 4c   | 0.2819(14) | 0.2500(0)  | 0.9704(5)  | 1.0 | 7.73(16)                            |
| P                                                                                                                                                  | 4c   | 0.0950(31) | 0.2500(0)  | 0.4174(8)  | 1.0 | 7.73(16)                            |
| O(1)                                                                                                                                               | 4c   | 0.0957(8)  | 0.2500(0)  | 0.7398(13) | 1.0 | 7.73(16)                            |
| O(2)                                                                                                                                               | 4c   | 0.4495(9)  | 0.2500(0)  | 0.2096(12) | 1.0 | 7.73(16)                            |
| O(3)                                                                                                                                               | 8d   | 0.1600(6)  | 0.0508(9)  | 0.2810(8)  | 1.0 | 7.73(16)                            |
| $a = 10.3393(29) \text{\AA}$ $b = 6.0154(17) \text{\AA}$ $c = 4.7004(16) \text{\AA}$<br>$\alpha = 90^\circ$ $\beta = 90^\circ$ $\gamma = 90^\circ$ |      |            |            |            |     |                                     |
| R-factors and weight fraction<br>$R_{\text{wp}} = 0.0076$ $R_{\text{p}} = 0.0051$ $\chi^2 = 8.483$                                                 |      |            |            |            |     |                                     |

---

(3) LiFe<sub>1.0</sub>PO<sub>4</sub>/C

---

| Atom | Site | <i>x</i>   | <i>y</i>  | <i>z</i>   | <i>g</i> | 100* <i>U</i> <sub>iso</sub> (Å <sup>2</sup> ) |
|------|------|------------|-----------|------------|----------|------------------------------------------------|
| Li   | 4a   | 0.0        | 0.0       | 0.0        | 1.0      | 5.25(25)                                       |
| Fe   | 4c   | 0.2820(13) | 0.2500(0) | 0.9711(4)  | 1.0      | 5.25(25)                                       |
| P    | 4c   | 0.0954(30) | 0.2500(0) | 0.4186(7)  | 1.0      | 5.25(25)                                       |
| O(1) | 4c   | 0.0941(7)  | 0.2500(0) | 0.7427(12) | 1.0      | 5.25(25)                                       |
| O(2) | 4c   | 0.4505(9)  | 0.2500(0) | 0.2078(11) | 1.0      | 5.25(25)                                       |
| O(3) | 8d   | 0.1594(5)  | 0.0503(8) | 0.2813(7)  | 1.0      | 5.25(25)                                       |

---

$$a = 10.3368(28) \text{ \AA} \quad b = 6.0141(16) \text{ \AA} \quad c = 4.7006(15) \text{ \AA}$$
$$\alpha = 90^\circ \quad \beta = 90^\circ \quad \gamma = 90^\circ$$

---

R-factors and weight fraction  
 $R_{wp} = 0.0078 \quad R_p = 0.0049 \quad \chi^2 = 10.53$

---

---

(4) LiFe<sub>1.02</sub>PO<sub>4</sub>/C

---

| Atom | Site | <i>x</i>   | <i>y</i>  | <i>z</i>   | <i>g</i> | 100* <i>U</i> <sub>iso</sub> (Å <sup>2</sup> ) |
|------|------|------------|-----------|------------|----------|------------------------------------------------|
| Li   | 4a   | 0.0        | 0.0       | 0.0        | 1.0      | 7.04(18)                                       |
| Fe   | 4c   | 0.2819(13) | 0.2500(0) | 0.9704(4)  | 1.0      | 7.04(18)                                       |
| P    | 4c   | 0.0955(31) | 0.2500(0) | 0.4179(7)  | 1.0      | 7.04(18)                                       |
| O(1) | 4c   | 0.0945(7)  | 0.2500(0) | 0.7419(12) | 1.0      | 7.04(18)                                       |
| O(2) | 4c   | 0.4495(9)  | 0.2500(0) | 0.2090(12) | 1.0      | 7.04(18)                                       |
| O(3) | 8d   | 0.1598(5)  | 0.0507(8) | 0.2795(7)  | 1.0      | 7.04(18)                                       |

---

$$a = 10.3365(31) \text{ \AA} \quad b = 6.0142(18) \text{ \AA} \quad c = 4.7006(17) \text{ \AA}$$
$$\alpha = 90^\circ \quad \beta = 90^\circ \quad \gamma = 90^\circ$$

---

R-factors and weight fraction  
 $R_{wp} = 0.0066 \quad R_p = 0.0046 \quad \chi^2 = 5.866$

---

---

(5) LiFe<sub>1.04</sub>PO<sub>4</sub>/C

---

| Atom | Site | <i>x</i>   | <i>y</i>  | <i>z</i>   | <i>g</i> | 100* <i>U</i> <sub>iso</sub> (Å <sup>2</sup> ) |
|------|------|------------|-----------|------------|----------|------------------------------------------------|
| Li   | 4a   | 0.0        | 0.0       | 0.0        | 1.0      | 7.98(16)                                       |
| Fe   | 4c   | 0.2818(15) | 0.2500(0) | 0.9706(5)  | 1.0      | 7.98(16)                                       |
| P    | 4c   | 0.0953(33) | 0.2500(0) | 0.4171(8)  | 1.0      | 7.98(16)                                       |
| O(1) | 4c   | 0.0961(8)  | 0.2500(0) | 0.7397(13) | 1.0      | 7.98(16)                                       |
| O(2) | 4c   | 0.4488(10) | 0.2500(0) | 0.2084(13) | 1.0      | 7.98(16)                                       |
| O(3) | 8d   | 0.1601(6)  | 0.0501(9) | 0.2812(8)  | 1.0      | 7.98(16)                                       |

---

a = 10.3372(33) Å   b = 6.0141(20) Å   c = 4.7005(18) Å  
α = 90°   β = 90°   γ = 90°

---

R-factors and weight fraction  
R<sub>wp</sub> = 0.0073   R<sub>p</sub> = 0.0049   χ<sup>2</sup> = 7.681

---

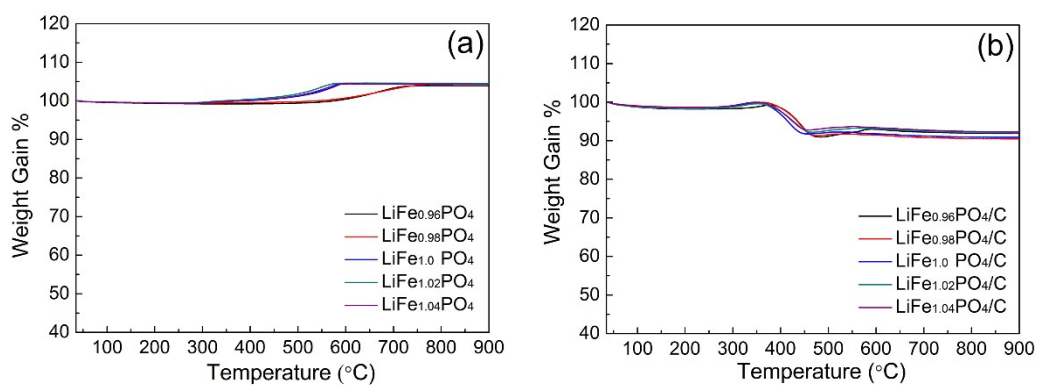

**Fig. S2** TG curves of (a)  $\text{LiFe}_x\text{PO}_4$  and (b)  $\text{LiFe}_x\text{PO}_4/\text{C}$ .

**Table S3** Carbon content of  $\text{LiFe}_x\text{PO}_4/\text{C}$ .

| Samples                                  | Carbon content (wt%) |
|------------------------------------------|----------------------|
| $\text{LiFe}_{0.96}\text{PO}_4/\text{C}$ | 13.22                |
| $\text{LiFe}_{0.98}\text{PO}_4/\text{C}$ | 14.59                |
| $\text{LiFe}_{1.0}\text{PO}_4/\text{C}$  | 14.18                |
| $\text{LiFe}_{1.02}\text{PO}_4/\text{C}$ | 12.99                |
| $\text{LiFe}_{1.04}\text{PO}_4/\text{C}$ | 12.78                |
